# Supplementary material for: Preparation of MES@Fe3O4@SiO2-PPy magnetic microspheres for the highly efficient removal of Cr(vi)
Source: Royal Society of Chemistry journal article supplement (doi:10.1039/d2nj04456k), 2022-01-01
Supplement: d2nj04456k1.pdf [file d2nj04456k1.pdf]

## Electronic Supplementary Information (ESI) for New Journal of Chemistry

### Preparation of MES@Fe<sub>3</sub>O<sub>4</sub>@SiO<sub>2</sub>-PPy magnetic microspheres for highly efficient removal of Cr(VI)

Zhaoxing Hu<sup>a</sup>, Liang Wang<sup>a</sup>, Mengxin Liu<sup>a</sup>, Ziqing Huang<sup>a</sup>, Jinyan Yang<sup>a</sup>, Wenhui Rao<sup>a</sup>, Heng Wang<sup>a</sup>, Yijun Xie<sup>b,\*</sup> and Chuanbai Yu<sup>a,\*</sup>

---

*a. Key Laboratory of New Processing Technology for Nonferrous Metal & Materials, Ministry of Education/Guangxi Key Laboratory of Optical and Electronic Materials and Devices, Guilin University of Technology, Guilin 541004, China.*

*b. Institute of Nanochemistry and Nanobiology, School of Environmental and Chemical Engineering, Shanghai University, Shanghai 200444, China.*

## 1. Text S1 experimental details

### 1.1 Preparation of monodispersed emulsion sphere

The monodispersed emulsion sphere (MES) microspheres were synthesized according to the previous study with several modifications.<sup>1</sup> Styrene (St), Methyl methacrylate (MMA), and Acrylic acid (AA) were stirred evenly in ultra-pure water. Then  $\text{NH}_4\cdot\text{HCO}_3$  and Sodium dodecyl benzene sulfonate (SDBS) were added while stirring with magnetic force at 70 °C for 30 min. Finally, Ammonium persulfate (APS) was added and the reaction continued for 10 h to prepare MES, which was sealed and stored.

### 1.2 Preparation of MES@Fe<sub>3</sub>O<sub>4</sub> composites

MES@Fe<sub>3</sub>O<sub>4</sub> (MF) was synthesized by chemical co-precipitation method. MES, FeCl<sub>2</sub>·4H<sub>2</sub>O, and FeCl<sub>3</sub>·6H<sub>2</sub>O were dispersed in ultra-pure water and mixed in N<sub>2</sub> atmosphere for 15 min. After that, NH<sub>3</sub>·H<sub>2</sub>O was added and the reaction continued for 1 h. The product was repeatedly washed with ultra-pure water until the filtrate was neutral, and then recycled with magnets. Finally, it was dried at 60 °C until constant weight.

### 1.3 Preparation of MES@Fe<sub>3</sub>O<sub>4</sub>@SiO<sub>2</sub> composites

MES@Fe<sub>3</sub>O<sub>4</sub>@SiO<sub>2</sub> (MFS) was synthesized by the Stöber method. Firstly, MES@Fe<sub>3</sub>O<sub>4</sub> was dispersed in dilute hydrochloric acid solution for ultrasonic activation for 15 min. Then the activated MES@Fe<sub>3</sub>O<sub>4</sub> was added to the mixed solution of absolute ethanol, ultra-pure water, and NH<sub>3</sub>·H<sub>2</sub>O, and mechanically stirred for 30 minutes. TEOS was slowly added to the above dispersion under stirring. Finally, the sample was recovered by magnet and washed with anhydrous ethanol and ultra-pure water three times each, and dried at 60 °C for 10 h to obtain MFS.

## 2. Table S1

**Table S1** Synthesis conditions of MES@Fe<sub>3</sub>O<sub>4</sub>@SiO<sub>2</sub>-PPy

| Sample   | MES@Fe <sub>3</sub> O <sub>4</sub> @SiO <sub>2</sub> (g) | Py(g) | FeCl <sub>3</sub> ·6H <sub>2</sub> O(g) |
|----------|----------------------------------------------------------|-------|-----------------------------------------|
| MFSP-I   | 1.0                                                      | 0.10  | 0.926                                   |
| MFSP-II  | 1.0                                                      | 0.20  | 1.852                                   |
| MFSP-III | 1.0                                                      | 0.30  | 2.778                                   |
| MFSP-IV  | 1.0                                                      | 0.40  | 3.704                                   |
| MFSP-V   | 1.0                                                      | 0.50  | 4.630                                   |
| MFSP-VI  | 1.0                                                      | 0.60  | 5.556                                   |
| MFSP-VII | 1.0                                                      | 0.70  | 6.428                                   |

|           |     |      |       |
|-----------|-----|------|-------|
| MFSP-VIII | 1.0 | 0.80 | 7.408 |
| MFSP-IX   | 1.0 | 0.90 | 8.334 |

---

### 3. Figure S1

Fig. S1 showed the DTG plots of PPy, MFS, and MFSP. Obviously, MFS was thermally stable until the temperature of 439 °C. After functionalization of PPy, the decomposition of MFSP nanocomposite occurs at 245 °C. The thermal stability of MFSP was slightly lower than that of MFS in the low temperature region, which might be PPy was easy to volatilize and decompose <sup>2</sup>.

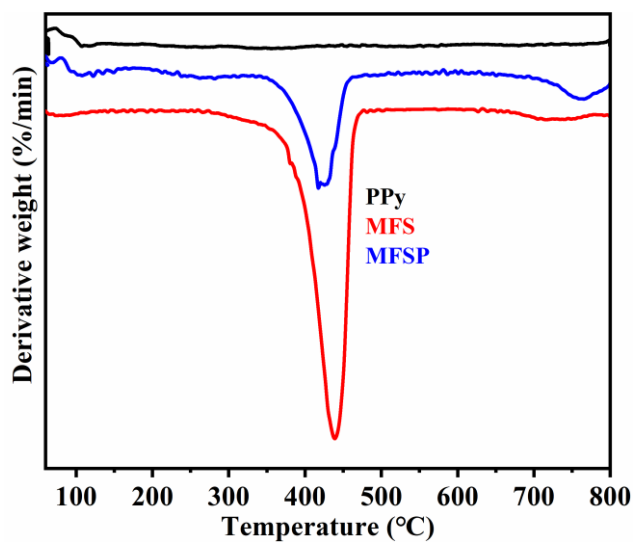

**Fig. S1** DTG curves of PPy, MFS, and MFSP.

### Notes and references

- 1 L. L. Du, P. Gao, Y. D. Meng, Y. L. Liu, S. W. Le and C. B. Yu, *Acs Omega*, 2020, **5**, 6651-6660.
- 2 M. Wysocka-Zolopa, I. Zablocka, E. Gradzka, J. Goclon and K. Winkler, *Microporous Mesoporous Mat.*, 2021, **317**, 110954.
